# Supplementary material for: Adipose Tissue Endothelial Cells From Obese Human Subjects: Differences Among Depots in Angiogenic, Metabolic, and Inflammatory Gene Expression and Cellular Senescence
Source: PubMed Central journal article supplement — Diabetes. 2010 Aug 16;59(11):2755–63. doi: 10.2337/db10-0398 (PMC2963533; doi:10.2337/db10-0398), 2010-08-16
Supplement: supp_db10-0398_db100398onlineappendix.pdf [file supp_db10-0398_db100398onlineappendix.pdf]

**Supplemental table.** Primer references from Applied Biosystems

| Gene            | Reference     |
|-----------------|---------------|
| CCL20           | Hs00171125-m1 |
| CXCL8           | Hs00174103-m1 |
| CCL2            | Hs00234140-m1 |
| ICAM1           | Hs00164932-m1 |
| PECAM1          | Hs00169777-m1 |
| Leptin receptor | Hs00174497-m1 |
| HIF-1 $\alpha$  | Hs00153153-m1 |
| HIF-2 $\alpha$  | Hs00181674-m1 |
| Leptin          | Hs00174877-m1 |
| ANGPTL4/FIAF    | Hs00211522-m1 |
| VEGFA           | Hs00173626-m1 |
| GLUT1           | Hs00197884-m1 |
| PPARgamma       | Hs00234592-m1 |
| GPIHBP1         | Hs01564843-m1 |
| SIRT1           | Hs00202021-m1 |
| IGFBP3          | Hs00181211-m1 |
| Neuropilin 1    | Hs00826129-m1 |
| Neuropilin 2    | Hs00187290-m1 |
| VEGFR1          | Hs00176573-m1 |
| VEGFR2          | Hs00176676-m1 |
| EL              | Hs00195812-m1 |
| LPL             | Hs00173425-m1 |

CC motif ligand 20 (CCL20), chemokine CXC motif ligand 8 (CXCL8), CC motif ligand 2 (CCL2), intercellular adhesion molecule-1 (ICAM1), platelet-endothelial cell adhesion molecule 1 (PECAM1), hypoxia inducible factor 1 or 2, alpha subunit (HIF-1 $\alpha$  HIF-2 $\alpha$ ), angiopoietin-like 4/fasting-induced adipose factor (ANGPTL4/FIAF), vascular endothelial growth factor A (VEGFA), glucose transporter 1 (GLUT1), peroxisome proliferator-activated receptor gamma (PPARgamma), GPI-anchored HDL-binding protein 1 (GPIHBP1), sirtuin 1 (SIRT1), insulin-like growth factor binding protein 3 (IGFBP3), vascular endothelial growth factor receptor 1 and 2 (VEGFR1 and 2), endothelial lipase (EL), and lipoprotein lipase (LPL).
